# Supplementary material for: Pathogenic convergence of CNVs in genes functionally associated to a severe neuromotor developmental delay syndrome
Source: PubMed Central journal article supplement (PMC7871650; doi:10.1186/s40246-021-00309-4), 2021-02-08
Supplement: 40246_2021_309_MOESM5_ESM.pdf [file 40246_2021_309_MOESM5_ESM.pdf]

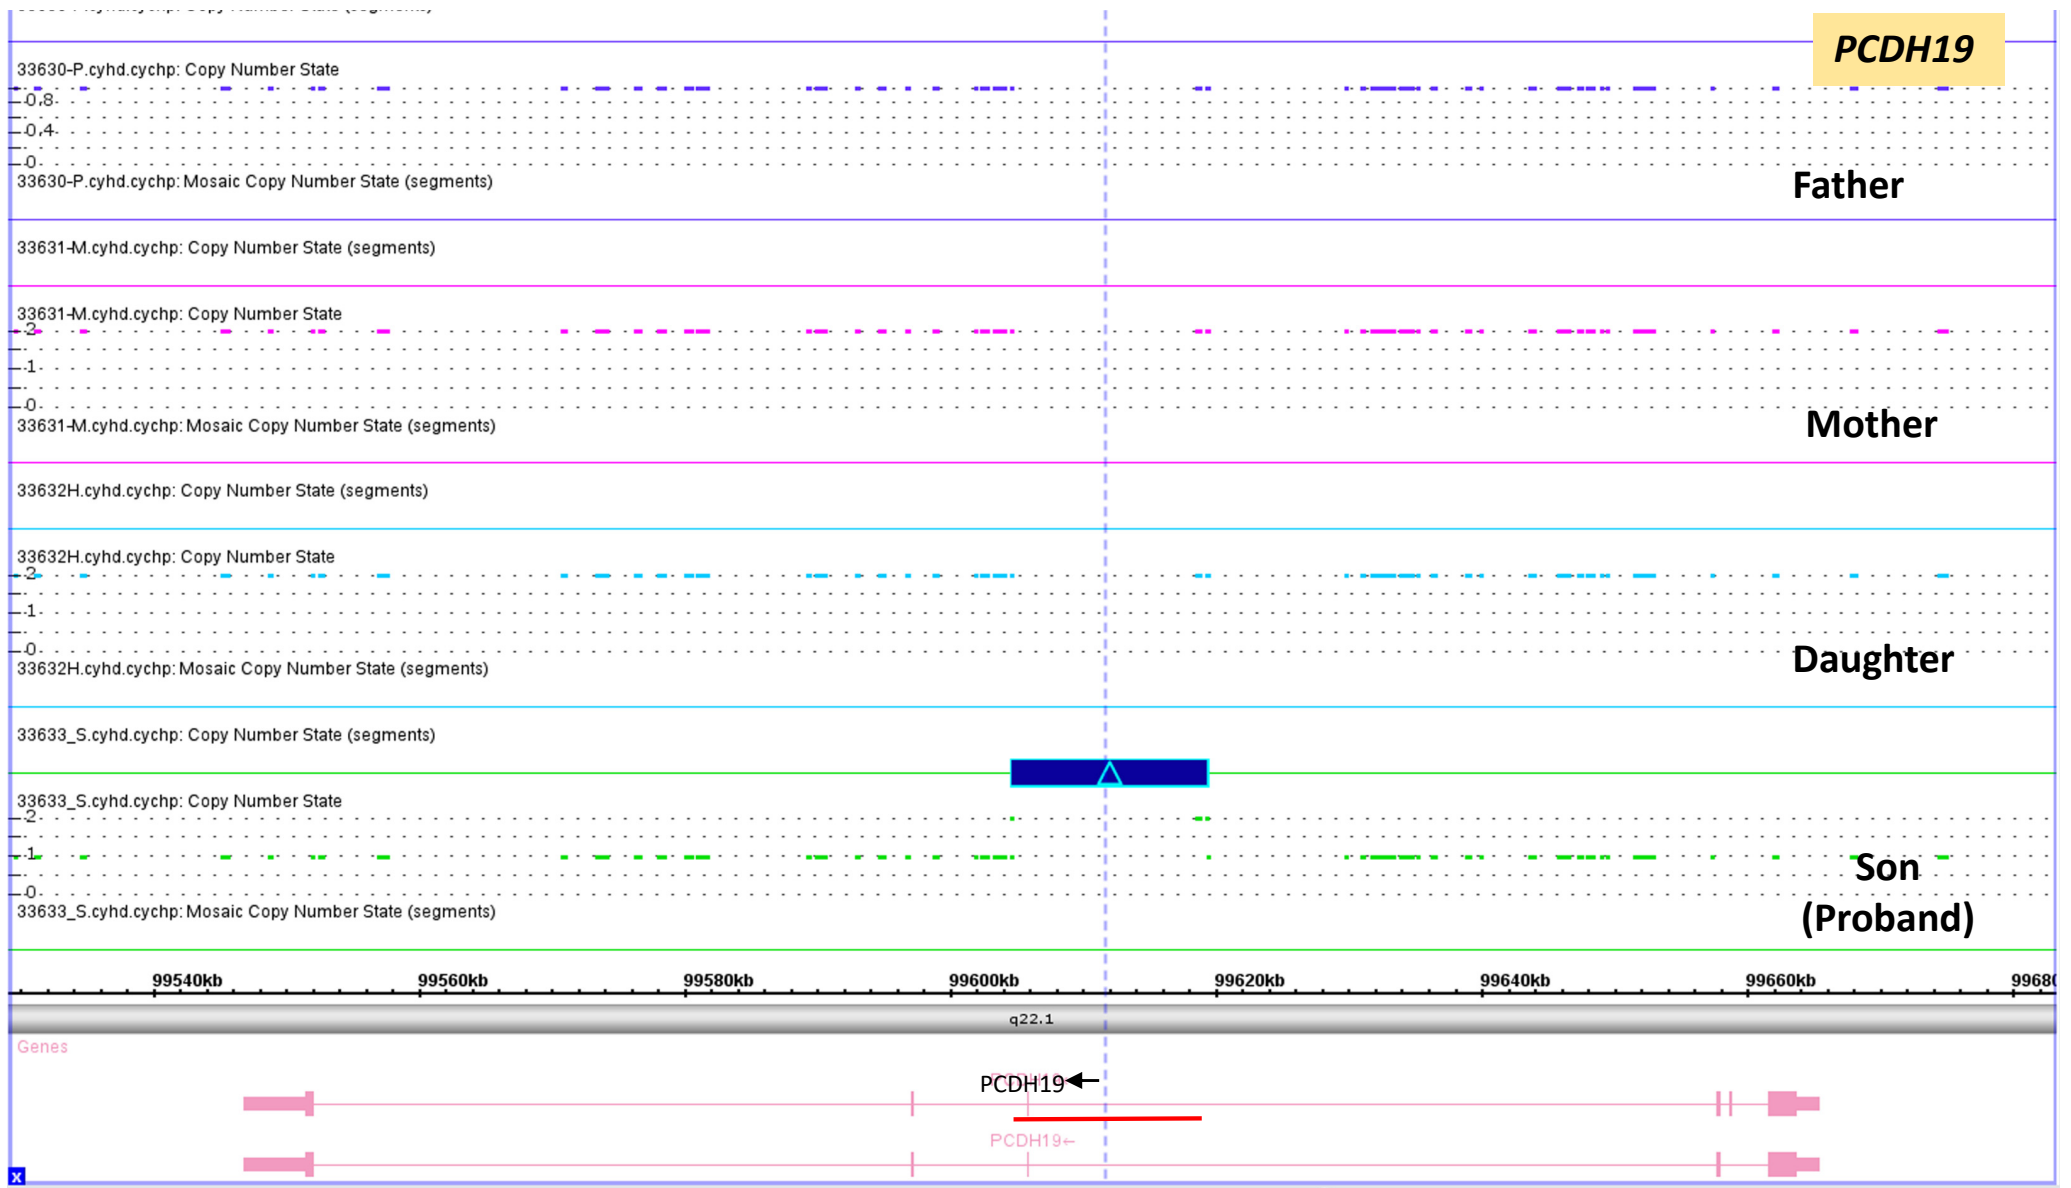

**Supplementary Figure S5. Duplication encompassing exon 3 in the *PCDH19* gene.** The genomic region comprising the *PCDH19* gene in the four family members is shown. The region deleted in the proband is marked by a box and a red line. The arrow indicates the direction of transcription.
