# Supplementary material for: Pathogenic convergence of CNVs in genes functionally associated to a severe neuromotor developmental delay syndrome
Source: PubMed Central journal article supplement (PMC7871650; doi:10.1186/s40246-021-00309-4), 2021-02-08
Supplement: 40246_2021_309_MOESM7_ESM.pdf [file 40246_2021_309_MOESM7_ESM.pdf]

## Supplementary Table S1

### de novo CNVs (> 1Kb) identified in patient

| Change  | Inheritance | Chromosome | Start (kb) | End (kb) | Size (kb) | Copy          | OMIM®             | Genes | Roles                                                  | Genes            |
|---------|-------------|------------|------------|----------|-----------|---------------|-------------------|-------|--------------------------------------------------------|------------------|
| GAIN    | DE NOVO     | 5          | q21.3      | q21.3    | 6,557     | 5             | EFNA5 (601535)    |       | <i>axonal guidance</i>                                 | EFNA5            |
|         | DE NOVO     | 13         | q21.32     | q21.32   | 13,662    | 36            | PCDH9 (603581)    |       | <i>indirect relation with epileptic-like phenotype</i> | PCDH9            |
|         | DE NOVO     | 19         | q13.42     | q13.42   | 2,052     | 5             |                   |       |                                                        |                  |
|         | DE NOVO     | 22         | q13.2      | q13.2    | 1,363     | 5             |                   |       |                                                        |                  |
|         | DE NOVO     | X          | p11.22     | p11.22   | 15,006    | 11            |                   |       |                                                        |                  |
|         | DE NOVO     | X          | p21.3      | p21.3    | 3,214     | 12            |                   |       |                                                        |                  |
|         | DE NOVO     | X          | p21.3      | p21.3    | 3,761     | 24            | IL1RAPL1 (300206) |       |                                                        | IL1RAPL1         |
|         | DE NOVO     | X          | p22.11     | p22.11   | 7,63      | 24            | SMS (300105)      |       |                                                        | SMS              |
|         | DE NOVO     | X          | q22.1      | q22.1    | 14,739    | 7             | PCDH19 (300460)   |       | <i>direct relation with epileptic-like phenotype</i>   | PCDH19           |
|         | DE NOVO     | X          | q23        | q23      | 24,223    | 61            |                   |       |                                                        |                  |
|         | DE NOVO     | X          | q24        | q24      | 1,174     | 13            |                   |       |                                                        |                  |
|         | DE NOVO     | X          | q25        | q25      | 6,256     | 9             |                   |       |                                                        |                  |
|         | DE NOVO     | X          | q25        | q25      | 3,752     | 5             |                   |       |                                                        |                  |
|         | DE NOVO     | X          | q26.2      | q26.2    | 1,204     | 16            |                   |       |                                                        |                  |
|         | DE NOVO     | X          | q26.3      | q26.3    | 3,769     | 18            |                   |       |                                                        |                  |
|         | DE NOVO     | X          | q26.3      | q26.3    | 1,039     | 12            |                   |       |                                                        |                  |
|         | DE NOVO     | X          | q28        | q28      | 5,945     | 15            |                   |       |                                                        | MAGEA9B, MAGEA9C |
|         | DE NOVO     | X          | q28        | q28      | 1,241     | 12            | CD99L2 (300846)   |       |                                                        | CD99L2           |
|         | DE NOVO     | X          | q28        | q28      | 17,473    | 72            | FLNA (300017)     |       |                                                        | FLNA             |
|         | DE NOVO     | 1          | p13.1      | p13.1    | 4,517     | 8             | IGSF3 (603491)    |       |                                                        | IGSF3            |
| DE NOVO | 1           | p21.1      | p21.1      | 16,579   | 12        |               |                   |       |                                                        |                  |
| DE NOVO | 1           | p22.2      | p22.2      | 4,387    | 6         | GBP1 (600411) |                   |       | GBP1                                                   |                  |
| DE NOVO | 1           | p22.3      | p22.3      | 2,638    | 8         |               |                   |       |                                                        |                  |

|         |   |        |        |        |    |                             |                                                              |                        |
|---------|---|--------|--------|--------|----|-----------------------------|--------------------------------------------------------------|------------------------|
| DE NOVO | 1 | p31.1  | p31.1  | 7,06   | 8  | ST6GALNAC3<br>(610133)      |                                                              | ST6GALNAC3             |
| DE NOVO | 1 | p34.3  | p34.3  | 26,157 | 12 | OSCP1 (608854)              |                                                              | OSCP1                  |
| DE NOVO | 1 | p36.32 | p36.32 | 9,928  | 12 |                             |                                                              | CEP104                 |
| DE NOVO | 1 | q21.1  | q21.1  | 70,518 | 51 | NBPF9 (613999)              |                                                              | LOC100288142, NBPF9, N |
| DE NOVO | 1 | q21.3  | q21.3  | 22,781 | 12 |                             |                                                              |                        |
| DE NOVO | 1 | q23.2  | q23.2  | 5,694  | 10 | <b>ATP1A2<br/>(182340)</b>  | <b>direct relation with<br/>epileptic-like<br/>phenotype</b> | ATP1A2                 |
| DE NOVO | 2 | q12.3  | q12.3  | 28,148 | 18 | RANBP2 (601181)             |                                                              | RANBP2                 |
| DE NOVO | 3 | p24.3  | p24.3  | 12,303 | 7  |                             |                                                              |                        |
| DE NOVO | 3 | q11.2  | q11.2  | 24,898 | 8  |                             |                                                              |                        |
| DE NOVO | 3 | q22.3  | q22.3  | 12,185 | 12 | PCCB (232050)               |                                                              | PCCB                   |
| DE NOVO | 3 | q26.1  | q26.1  | 7,653  | 8  |                             |                                                              |                        |
| DE NOVO | 3 | q27.1  | q27.1  | 11,876 | 6  |                             |                                                              | MCF2L2                 |
| DE NOVO | 3 | q29    | q29    | 34,906 | 12 |                             |                                                              | SDHAP1                 |
| DE NOVO | 4 | p15.33 | p15.33 | 9,192  | 8  |                             |                                                              |                        |
| DE NOVO | 4 | p16.3  | p16.3  | 3,039  | 5  |                             |                                                              | FAM193A                |
| DE NOVO | 4 | q22.2  | q22.2  | 10,03  | 8  |                             |                                                              |                        |
| DE NOVO | 5 | p13.3  | p13.3  | 5,901  | 6  |                             |                                                              |                        |
| DE NOVO | 5 | p15.1  | p15.1  | 3,668  | 13 |                             |                                                              |                        |
| DE NOVO | 5 | q11.2  | q11.2  | 5,655  | 8  | ANKRD55<br>(615189)         |                                                              | ANKRD55                |
| DE NOVO | 5 | q35.3  | q35.3  | 80,37  | 76 |                             |                                                              | ZNF354B, ZFP2          |
| DE NOVO | 6 | p12.3  | p12.3  | 11,013 | 8  | CRISP2 (187430)             |                                                              | CRISP2                 |
| DE NOVO | 6 | q13    | q13    | 22,495 | 20 | <b>SLC17A5<br/>(604322)</b> | <b>direct relation with<br/>epileptic-like<br/>phenotype</b> | SLC17A5                |
| DE NOVO | 6 | q22.32 | q22.32 | 7,794  | 8  |                             |                                                              |                        |
| DE NOVO | 6 | q23.2  | q23.2  | 11,702 | 8  | TBPL1 (605521)              |                                                              | TBPL1                  |

|         |         |       |        |        |        |               |                                          |                                                                         |
|---------|---------|-------|--------|--------|--------|---------------|------------------------------------------|-------------------------------------------------------------------------|
| LOSSES  | DE NOVO | 7     | p14.3  | p14.3  | 46,991 | 36            | NPSR1-AS1<br>(608596), NPSR1<br>(608595) | NPSR1-AS1, NPSF                                                         |
|         | DE NOVO | 7     | p15.3  | p15.3  | 5,134  | 8             | TRA2A (602718)                           | TRA2A                                                                   |
|         | DE NOVO | 7     | q11.21 | q11.21 | 7,317  | 9             | TPST1 (603125)                           | TPST1                                                                   |
|         | DE NOVO | 7     | q32.1  | q32.1  | 11,833 | 12            | TNPO3 (610032)                           | TNPO3                                                                   |
|         | DE NOVO | 7     | q34    | q34    | 10,443 | 24            | PRSS2 (601564)                           | PRSS3P2, PRSS2                                                          |
|         | DE NOVO | 8     | p23.1  | p23.1  | 2,463  | 6             | MSRA (601250)                            | MSRA                                                                    |
|         | DE NOVO | 8     | p23.2  | p23.2  | 7,925  | 12            | CSMD1 (608397)                           | CSMD1                                                                   |
|         | DE NOVO | 8     | p23.3  | p23.3  | 15,208 | 8             |                                          |                                                                         |
|         | DE NOVO | 8     | q12.1  | q12.1  | 12,412 | 12            | NSMAF (603043)                           | NSMAF                                                                   |
|         | DE NOVO | 8     | q24.12 | q24.12 | 9,326  | 6             |                                          |                                                                         |
|         | DE NOVO | 9     | p21.3  | p21.3  | 15,971 | 18            | ELAVL2 (601673)                          | ELAVL2                                                                  |
|         | DE NOVO | 9     | q22.1  | q22.1  | 7,098  | 8             |                                          |                                                                         |
|         | DE NOVO | 9     | q34.13 | q34.13 | 3,43   | 8             | NUP214 (114350)                          | NUP214                                                                  |
|         | DE NOVO | 10    | p12.31 | p12.31 | 6,292  | 12            |                                          |                                                                         |
|         | DE NOVO | 10    | p12.31 | p12.31 | 6,716  | 8             |                                          |                                                                         |
|         | DE NOVO | 10    | p13    | p13    | 3,167  | 12            |                                          |                                                                         |
|         | DE NOVO | 10    | p13    | p13    | 3,437  | 8             |                                          |                                                                         |
|         | DE NOVO | 10    | p14    | p14    | 9,561  | 11            |                                          |                                                                         |
|         | DE NOVO | 10    | q23.1  | q23.1  | 13,25  | 10            |                                          |                                                                         |
|         | DE NOVO | 11    | q12.1  | q12.1  | 11,36  | 10            | <b>LRR55 (615213)</b>                    | <b>indirect relation<br/>with epileptic-like<br/>phenotype</b><br>LRR55 |
|         | DE NOVO | 11    | q14.3  | q14.3  | 4,874  | 7             |                                          |                                                                         |
| DE NOVO | 11      | q22.1 | q22.1  | 11,109 | 8      |               |                                          |                                                                         |
| DE NOVO | 12      | p12.2 | p12.2  | 11,034 | 6      |               |                                          |                                                                         |
| DE NOVO | 12      | q23.3 | q23.3  | 9,476  | 8      | RFX4 (603958) | LOC100287944, RFX4                       |                                                                         |
| DE NOVO | 13      | q13.3 | q13.3  | 3,931  | 5      |               |                                          |                                                                         |
| DE NOVO | 13      | q13.3 | q13.3  | 38,162 | 18     |               |                                          |                                                                         |

|         |    |        |        |        |    |                                   |                                                        |                |
|---------|----|--------|--------|--------|----|-----------------------------------|--------------------------------------------------------|----------------|
| DE NOVO | 13 | q21.32 | q21.32 | 7,876  | 20 | <b>PCDH9 (603581)</b>             | <b>Epileptic encephalopathy</b>                        | PCDH9          |
| DE NOVO | 13 | q33.1  | q33.1  | 3,389  | 8  | <b>NALCN (611549)</b>             | <b>direct relation with epileptic-like phenotype</b>   | NALCN          |
| DE NOVO | 13 | q33.1  | q33.1  | 3,744  | 8  | <b>NALCN (611549)</b>             | <b>direct relation with epileptic-like phenotype</b>   | NALCN          |
| DE NOVO | 13 | q34    | q34    | 7,663  | 8  | COL4A2 (120090)                   |                                                        | COL4A2         |
| DE NOVO | 15 | q11.2  | q11.2  | 5,287  | 12 | PWRN1 (611215)                    |                                                        | PWRN1          |
| DE NOVO | 15 | q14    | q14    | 21,858 | 20 | <b>RYR3 (180903)</b>              | <b>Dystonia</b>                                        | RYR3           |
| DE NOVO | 16 | p12.3  | p12.3  | 1,777  | 8  | XYLT1 (608124)                    |                                                        | XYLT1          |
| DE NOVO | 16 | p13.13 | p13.13 | 7,687  | 12 |                                   |                                                        |                |
| DE NOVO | 16 | q23.3  | q23.3  | 2,528  | 6  | <b>CDH13 (601364)</b>             | <b>indirect relation with epileptic-like phenotype</b> | CDH13          |
| DE NOVO | 18 | q11.2  | q11.2  | 19,583 | 10 |                                   |                                                        |                |
| DE NOVO | 19 | p13.12 | p13.12 | 17,684 | 16 |                                   |                                                        |                |
| DE NOVO | 22 | q11.21 | q11.21 | 8,033  | 10 | SLC25A18 (609303)                 |                                                        | SLC25A18       |
| DE NOVO | 22 | q13.31 | q13.31 | 13,2   | 27 | PPARA (170998)                    |                                                        | PPARA          |
| DE NOVO | X  | p22.33 | p22.33 | 2,65   | 8  | ASMTL (300162),<br>ASMTL (400011) |                                                        | ASMTL-AS1, ASM |
| DE NOVO | X  | q23    | q23    | 10,255 | 8  | HTR2C (312861)                    |                                                        | HTR2C          |
| DE NOVO | X  | q24    | q24    | 6,689  | 8  |                                   |                                                        |                |
| DE NOVO | X  | q28    | q28    | 5,02   | 16 |                                   |                                                        | arr[hg19       |

### Microarray Nomenclature

arr[hg19] 5q21.3(106,927,863-106,934,420)x4

arr[hg19] 13q21.32(67,272,417-67,286,079)x3

arr[hg19] 19q13.42(55,201,026-55,203,078)x4

arr[hg19] 22q13.2(41,072,903-41,074,266)x4

arr[hg19] Xp11.22(53,541,865-53,556,871)x2

arr[hg19] Xp21.3(25,074,293-25,077,507)x2

arr[hg19] Xp21.3(29,276,308-29,280,069)x2

arr[hg19] Xp22.11(22,004,718-22,012,348)x2

arr[hg19] Xq22.1(99,604,400-99,619,139)x2

arr[hg19] Xq23(115,133,383-115,157,606)x2

arr[hg19] Xq24(119,778,456-119,779,630)x2

arr[hg19] Xq25(122,230,315-122,236,571)x2

arr[hg19] Xq25(127,130,942-127,134,694)x3

arr[hg19] Xq26.2(133,173,923-133,175,127)x2

arr[hg19] Xq26.3(134,810,201-134,813,970)x2

arr[hg19] Xq26.3(135,532,754-135,533,793)x2

arr[hg19] Xq28(148,859,679-148,865,624)x3

arr[hg19] Xq28(149,968,359-149,969,600)x2

arr[hg19] Xq28(153,576,695-153,594,168)x2

arr[hg19] 1p13.1(117,119,919-117,124,436)x1

arr[hg19] 1p21.1(106,012,740-106,029,319)x1

arr[hg19] 1p22.2(89,523,245-89,527,632)x1

arr[hg19] 1p22.3(87,771,209-87,773,847)x1

arr[hg19] 1p31.1(76,917,405-76,924,465)x1

arr[hg19] 1p34.3(36,878,023-36,904,180)x1

arr[hg19] 1p36.32(3,744,260-3,754,188)x1

arr[hg19] 1q21.1(145,195,939-145,266,457)x1

arr[hg19] 1q21.3(154,333,126-154,355,907)x1

arr[hg19] 1q23.2(160,089,753-160,095,447)x1

arr[hg19] 2q12.3(109,337,737-109,365,885)x1

arr[hg19] 3p24.3(22,463,696-22,475,999)x1

arr[hg19] 3q11.2(95,454,290-95,479,188)x1

arr[hg19] 3q22.3(136,019,293-136,031,478)x1

arr[hg19] 3q26.1(162,314,772-162,322,425)x1

arr[hg19] 3q27.1(183,114,782-183,126,658)x1

arr[hg19] 3q29(195,690,227-195,725,133)x1

arr[hg19] 4p15.33(13,713,537-13,722,729)x1

arr[hg19] 4p16.3(2,681,413-2,684,452)x1

arr[hg19] 4q22.2(95,032,937-95,042,967)x1

arr[hg19] 5p13.3(32,987,711-32,993,612)x1

arr[hg19] 5p15.1(15,016,626-15,020,294)x1

arr[hg19] 5q11.2(55,426,360-55,432,015)x1

arr[hg19] 5q35.3(178,284,135-178,364,505)x1

arr[hg19] 6p12.3(49,668,364-49,679,377)x1

arr[hg19] 6q13(74,316,466-74,338,961)x1

arr[hg19] 6q22.32(126,675,340-126,683,134)x1

arr[hg19] 6q23.2(134,266,254-134,277,956)x1

arr[hg19] 7p14.3(34,673,682-34,720,673)x1

arr[hg19] 7p15.3(23,567,211-23,572,345)x1

arr[hg19] 7q11.21(65,733,326-65,740,643)x1

arr[hg19] 7q32.1(128,599,661-128,611,494)x1

arr[hg19] 7q34(142,475,398-142,485,841)x0

arr[hg19] 8p23.1(10,051,419-10,053,882)x1

arr[hg19] 8p23.2(3,468,179-3,476,104)x1

arr[hg19] 8p23.3(591,148-606,356)x1

arr[hg19] 8q12.1(59,511,848-59,524,260)x1

arr[hg19] 8q24.12(121,105,289-121,114,615)x1

arr[hg19] 9p21.3(23,721,531-23,737,502)x1

arr[hg19] 9q22.1(90,507,004-90,514,102)x1

arr[hg19] 9q34.13(134,066,956-134,070,386)x1

arr[hg19] 10p12.31(19,356,747-19,363,039)x1

arr[hg19] 10p12.31(19,679,317-19,686,033)x1

arr[hg19] 10p13(14,501,235-14,504,402)x1

arr[hg19] 10p13(16,015,462-16,018,899)x1

arr[hg19] 10p14(6,782,428-6,791,989)x1

arr[hg19] 10q23.1(86,601,979-86,615,229)x1

arr[hg19] 11q12.1(56,957,508-56,968,868)x1

arr[hg19] 11q14.3(90,328,742-90,333,616)x1

arr[hg19] 11q22.1(101,473,932-101,485,041)x1

arr[hg19] 12p12.2(20,064,688-20,075,722)x1

arr[hg19] 12q23.3(107,055,845-107,065,321)x1

arr[hg19] 13q13.3(37,957,087-37,961,018)x1

arr[hg19] 13q13.3(38,520,812-38,558,974)x1

arr[hg19] 13q21.32(67,501,784-67,509,660)x1

arr[hg19] 13q33.1(101,817,975-101,821,364)x1

arr[hg19] 13q33.1(101,893,499-101,897,243)x1

arr[hg19] 13q34(111,110,029-111,117,692)x1

arr[hg19] 15q11.2(24,805,897-24,811,184)x1

arr[hg19] 15q14(33,763,268-33,785,126)x1

arr[hg19] 16p12.3(17,479,996-17,481,773)x1

arr[hg19] 16p13.13(12,039,814-12,047,501)x1

arr[hg19] 16q23.3(82,679,436-82,681,964)x1

arr[hg19] 18q11.2(24,980,101-24,999,684)x1

arr[hg19] 19p13.12(15,033,591-15,051,275)x1

arr[hg19] 22q11.21(18,050,896-18,058,929)x1

arr[hg19] 22q13.31(46,601,910-46,615,110)x1

9] Xp22.33 or Yp11.32(1,520,755-1,523,405 or 1,470,755-1,473,405)x1

arr[hg19] Xq23(113,974,875-113,985,130)x0

arr[hg19] Xq24(119,960,837-119,967,526)x0

0] Xq28 or Yq12(154,941,868-154,946,888 or 59,044,874-59,049,894)x1
