# Supplementary material for: Pathogenic convergence of CNVs in genes functionally associated to a severe neuromotor developmental delay syndrome
Source: PubMed Central journal article supplement (PMC7871650; doi:10.1186/s40246-021-00309-4), 2021-02-08
Supplement: 40246_2021_309_MOESM8_ESM.pdf [file 40246_2021_309_MOESM8_ESM.pdf]

## Supplementary Table S2. Regions with loss of heterozygosity (LOH)

### Supplementary Table S2. Regions with loss of heterozygosity (LOH) > 3 Mb in the patient

| Type | Chromosome | Cytoband Start | Cytoband End | CytoRegions | Size (kb) | Marker Count | Gene Count | OMIM® Genes Count |
|------|------------|----------------|--------------|-------------|-----------|--------------|------------|-------------------|
|------|------------|----------------|--------------|-------------|-----------|--------------|------------|-------------------|

LOH

16

q22.1

q22.1

q22.1

3502,323

468

100

66

|     |    |       |       |              |          |     |    |   |
|-----|----|-------|-------|--------------|----------|-----|----|---|
| LOH | 16 | p11.2 | p11.1 | p11.2, p11.1 | 3590,042 | 236 | 18 | 1 |
|-----|----|-------|-------|--------------|----------|-----|----|---|

**Supplementary Table S2. Regions with loss of heterozygosity (LOH) < 3 Mb in the patient**

| Type | Chromosome | Cytoband Start | Cytoband End | CytoRegions | Size (kb) | Marker Count | Gene Count | OMIM® Genes Count |
|------|------------|----------------|--------------|-------------|-----------|--------------|------------|-------------------|
| LOH  | 1          | p36.13         | p36.13       | p36.13      | 1439,436  | 221          | 21         | 12                |

LOH

3

q22.2

q22.3

q22.3, q22.2 1404,567

229

7

6

LOH

3

q29

q29

q29

1102,963

177

12

8

|     |   |       |       |       |          |     |   |   |
|-----|---|-------|-------|-------|----------|-----|---|---|
| LOH | 4 | p15.1 | p15.1 | p15.1 | 2121,445 | 508 | 0 | 0 |
|-----|---|-------|-------|-------|----------|-----|---|---|

|     |   |       |       |       |          |     |   |   |
|-----|---|-------|-------|-------|----------|-----|---|---|
| LOH | 4 | q13.3 | q13.3 | q13.3 | 1262,461 | 276 | 5 | 5 |
|-----|---|-------|-------|-------|----------|-----|---|---|



|     |   |       |       |       |          |     |   |   |
|-----|---|-------|-------|-------|----------|-----|---|---|
| LOH | 5 | q12.1 | q12.1 | q12.1 | 1014,239 | 235 | 5 | 3 |
|-----|---|-------|-------|-------|----------|-----|---|---|

|     |   |       |       |       |          |     |   |   |
|-----|---|-------|-------|-------|----------|-----|---|---|
| LOH | 5 | q14.3 | q14.3 | q14.3 | 1199,182 | 298 | 3 | 1 |
|-----|---|-------|-------|-------|----------|-----|---|---|

|     |   |       |       |       |          |     |    |    |
|-----|---|-------|-------|-------|----------|-----|----|----|
| LOH | 5 | q33.3 | q33.3 | q33.3 | 1257,535 | 296 | 17 | 11 |
|-----|---|-------|-------|-------|----------|-----|----|----|

LOH

7

q11.23

q11.23

q11.23

1323,292

49

23

8

LOH

7

q31.1

q31.1

q31.1

1162,935

292

3

2

|     |   |        |        |        |          |     |   |   |
|-----|---|--------|--------|--------|----------|-----|---|---|
| LOH | 8 | q24.21 | q24.21 | q24.21 | 1100,735 | 295 | 1 | 0 |
|-----|---|--------|--------|--------|----------|-----|---|---|

|     |   |        |        |                   |          |     |    |   |
|-----|---|--------|--------|-------------------|----------|-----|----|---|
| LOH | 9 | q22.32 | q22.33 | q22.33,<br>q22.32 | 1097,566 | 200 | 18 | 4 |
|-----|---|--------|--------|-------------------|----------|-----|----|---|

LOH

9

q34.11

q34.11

q34.11

1082,798

123

43

28



|     |    |        |        |        |          |     |    |   |
|-----|----|--------|--------|--------|----------|-----|----|---|
| LOH | 10 | q11.22 | q11.22 | q11.22 | 1333,722 | 167 | 17 | 8 |
|-----|----|--------|--------|--------|----------|-----|----|---|

LOH

10

q26.13

q26.13

q26.13

1017,369

287

19

10

|     |    |       |       |              |          |     |   |   |
|-----|----|-------|-------|--------------|----------|-----|---|---|
| LOH | 11 | p14.3 | p14.2 | p14.2, p14.3 | 1165,542 | 521 | 1 | 1 |
|-----|----|-------|-------|--------------|----------|-----|---|---|

LOH

12

q14.2

q14.3

q14.3, q14.2 1715,137

395

14

9

|     |    |        |        |        |          |     |    |    |
|-----|----|--------|--------|--------|----------|-----|----|----|
| LOH | 12 | q24.31 | q24.31 | q24.31 | 1298,504 | 167 | 31 | 21 |
|-----|----|--------|--------|--------|----------|-----|----|----|

|     |    |        |        |                   |          |     |   |   |
|-----|----|--------|--------|-------------------|----------|-----|---|---|
| LOH | 13 | q21.31 | q21.32 | q21.32,<br>q21.31 | 1211,013 | 300 | 0 | 0 |
|-----|----|--------|--------|-------------------|----------|-----|---|---|

LOH

13

q32.3

q32.3

q32.3

1326,902

364

13

6

LOH

19

p13.2

p13.2

p13.2

1030,625

219

31

11



**OMIM<sup>®</sup> Genes**

**Full Location**

TRADD (603500), FBXL8 (609077), HSF4 (602438), NOL3 (605235), EXOC3L1 (614117), E2F4 (600659), ELMO3 (606422), MIR328 (613701), FHOD1 (606881), SLC9A5 (600477), PLEKHG4 (609526), TPPP3 (616957), HSD11B2 (614232), ATP6V0D1 (607028), AGRP (602311), CTCF (604167), CARMIL2 (610859), ACD (609377), PARD6A (607484), RANBP10 (614031), TSNAXIP1 (607720), CENPT (611510), THAP11 (609119), NUTF2 (605813), EDC4 (606030), PSKH1 (177015), CTRL (118888), PSMB10 (176847), LCAT (606967), SLC12A4 (604119), DPEP3 (609926), DPEP2 (609925), DDX28 (607618), DUS2 (609707), NFATC3 (602698), ESRP2 (612960), PLA2G15 (609362), SLC7A6 (605641), PRMT7 (610087), SMPD3 (605777), ZFP90 (609451), CDH3 (114021), CDH1 (192090), HAS3 (602428), CHTF8 (613202), UTP4 (607456), SNTB2 (600027), VPS4A (609982), COG8 (606979), TERF2 (602027), CYB5B (611964), NFAT5 (604708), NQO1 (125860), NOB1 (613586), WWP2 (602308), MIR140 (611894), CLEC18A (616571), CLEC18C (616573), EXOSC6 (606490), AARS (601065), DDX19B (605812), ST3GAL2 (607188), FUK (608675), COG4 (606976), SF3B3 (605592), IL34 (612081) chr16:67174211-70676534

ZNF267 (604752)

chr16:31630502-35220544

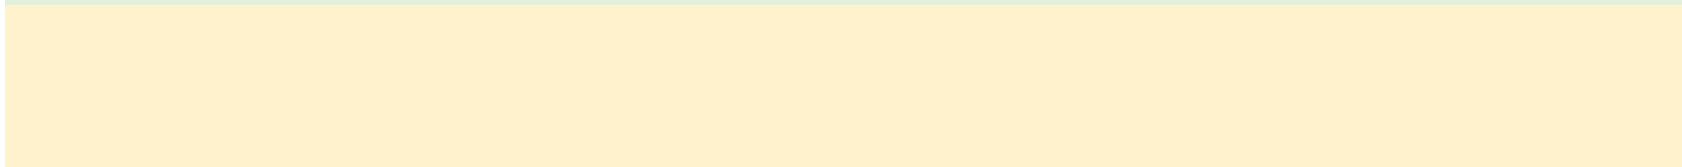

**OMIM® Genes****Full Location**

NECAP2 (611624), NBPF1 (610501), MFAP2 (156790), ATP13A2 (610513), SDHB (185470), PADI2 (607935), PADI1 (607934), PADI3 (606755), PADI4 (605347), PADI6 (610363), RCC2 (609587), ARHGEF10L (612494)

chr1:16736737-18176173

PPP2R3A (604944), MSL2 (614802), PCCB (232050), STAG1 (604358), NCK1 (600508), IL20RB  
(605621)

chr3:135285824-136690391

XXYLT1 (614552), ACAP2 (607766), PPP1R2 (601792), APOD (107740), MIR570 (614538), MUC20 (610360), MUC4 (158372), TNK2 (606994) chr3:194650488-195753451

chr4:32417743-34539188

MOB1B (609282), DCK (125450), SLC4A4 (603345), GC (139200), NPFFR2 (607449)

chr4:71709992-72972453



KIF2A (602591), DIMT1 (612499), IPO11 (610889)

chr5:61362329-62376568

COX7C (603774)

chr5:84996731-86195913

SGCD (601411), TIMD4 (610096), HAVCR1 (606518), HAVCR2 (606652), MED7 (605045), ITK (186973), CYFIP2 (606323), NIPAL4 (609383), ADAM19 (603640), SOX30 (606698), CLINT1 (607265) chr5:156038647-157296182

GTF2IRD1 (604318), GTF2I (601679), NCF1 (608512), GTF2IRD2 (608899), GTF2IRD2B (608900), chr7:73843868-75167160  
TRIM73 (612549), TRIM74 (612550), HIP1 (601767)

IMMP2L (605977), DOCK4 (607679)

chr7:110303526-111466461

chr8:129124948-130225683

SLC35D2 (609182), ZNF367 (610160), CDC14B (603505), CTSV (603308)

chr9:99066432-100163998

ENG (131195), AK1 (103000), ST6GALNAC6 (610135), ST6GALNAC4 (606378), PIP5KL1 (612865), chr9:130607711-131690509  
DPM2 (603564), FAM102A (610891), NAIF1 (610673), SLC25A25 (608745), PTGES2 (608152), LCN2  
(600181), CIZ1 (611420), DNMT1 (602377), MIR199B (614791), GOLGA2 (602580), TRUB2 (610727),  
COQ4 (612898), SLC27A4 (604194), URM1 (612693), ODF2 (602015), GLE1 (603371), SPTAN1  
(182810), WDR34 (613363), SET (600960), PKN3 (610714), ENDOG (600440), CCBL1 (600547),  
LRRC8A (608360)



RBP3 (180290), GDF2 (605120), GDF10 (601361), PTPN20B (610631), PTPN20A (610630), FRMPD2 (613323), MAPK8 (601158), ARHGAP22 (610585) chr10:48365294-49699016

PLEKHA1 (607772), ARMS2 (611313), HTRA1 (602194), DMBT1 (601969), PSTK (611310), IKZF5 (606238), ACADSB (600301), HMX3 (613380), HMX2 (600647), BUB3 (603719) chr10:124165614-125182983

ANO3 (610110)

chr11:25377880-26543422

SRGAP1 (606523), XPOT (603180), TBK1 (604834), RASSF3 (607019), GNS (607664), TBC1D30  
(615077), WIF1 (605186), LEMD3 (607844), MSRB3 (613719)

chr12:64434226-66149363

HCAR3 (606039), HCAR1 (606923), DENR (604550), CCDC62 (613481), HIP1R (605613), VPS37B (610037), ABCB9 (605453), ARL6IP4 (607668), PITPNM2 (608920), MPHOSPH9 (605501), C12orf65 (613541), CDK2AP1 (602198), SBNO1 (614274), SETD8 (607240), RILPL2 (614093), RILPL1 (614092), EIF2B1 (606686), GTF2H3 (601750), TCTN2 (613846), ATP6V0A2 (611716), DNAH10 (605884) chr12:123201038-124499542

chr13:65352957-66563970

GPR18 (602042), GPR183 (605741), TM9SF2 (604678), CLYBL (609686), ZIC2 (603073), PCCA  
(232000)

chr13:99774561-101101463

PRKCSH (177060), ELAVL3 (603458), ZNF653 (611371), ECSIT (608388), CNN1 (600806), ACP5 (171640), ZNF627 (612248), ZNF69 (194543), ZNF20 (194557), ZNF136 (604078), ZNF44 (194542) chr19:11509008-12539633



**DGV**

**Segmental Duplications**

nsv524363, nsv952044, nsv827707,  
nsv522852, nsv476845, nsv1160429,  
nsv524492, nsv471092, nsv457513,  
nsv572905, esv3582279, esv3638880,  
esv2079182, esv2714647, esv3553596,  
esv2657710, esv3638881, nsv572906,  
esv3553597, esv3638882, esv2668436,  
esv9318, nsv819753, nsv1144771, nsv827708,  
esv3638883, nsv833265, nsv1116155,  
esv3638884, nsv1841, esv3638885,  
nsv952045, nsv1142201, nsv833266,  
nsv827710, nsv1126431, esv2622215,  
esv2247849, esv3553599, esv2714648,  
esv2678491, nsv1070769, esv3638887,  
esv2659219, esv2714649, esv3638888,  
esv992883, esv3638889, esv29734,  
nsv827711, esv3329286, esv26764,  
nsv1070770, nsv1112693, esv3638890,  
esv2668512, esv3638891, esv2714650,  
nsv952046, nsv479975, nsv475320, nsv1842,  
nsv952047, esv2662518, esv3638893,  
nsv572907, nsv1127510, nsv1131266,  
dgv502e199, nsv1131268, nsv478420,  
nsv984342, nsv1131269, nsv1844, nsv977988,  
esv2591720, esv2670395, esv3638894,  
esv21655, nsv442402, esv3638895,  
nsv473126, nsv476694, esv2658552,

chr18:10722695, chrX:44492714, chr16:74433670, chr16:70200495, chr16:30230535, chr16:29491194,  
chr16:29388924, chr16:21409777, chr16:21841890, chr16:28463950, chr16:15453819, chr16:14843013,  
chr16:16428054, chr16:18408131, chr16:16471364, chr16:74408569, chr16:29046500, chr16:28350125,  
chr16:28763105, chr18:11615581, chr16:28635954, chr16:22547301, chr16:70233640, chr16:18448287,  
chr16:15195185, chr16:15029567, chr16:14803890, chr16:12018586, chr16:14781004, chr16:21416341,  
chr16:22511242, chr16:21848792, chr16:29395337, chr16:30236852, chr16:29496882, chr16:14800007,  
chr16:14838092, chr16:15473533, chr16:15502806, chr16:70239881, chr16:15507879, chr16:15059317,  
chr10:93874931, chr16:74559327, chr16:74477221, chr16:74365502, chr16:74362139, chr16:74425624,  
chr16:69977498, chr16:15453636, chr16:30230342, chr16:29491001, chr16:28463765, chr16:29063743,  
chr16:28783824, chr16:16487773, chr16:18407970, chr16:28669699, chr16:14859263, chr16:22547754,  
chr16:29388771, chr16:28349972, chr18:11615428, chr16:21841739, chr16:21409628, chr16:16444409,  
chr16:18448145, chr16:70006499, chr16:15045875, chr16:14820143, chr16:70036732, chr16:28637157,  
chr16:15481534, chr16:22496825, chr16:21444537, chr16:21876817, chr16:29423218, chr16:30265000,  
chr16:29525015, chr16:15507880, chr16:18996311, chr16:22552620, chr16:18867661, chr16:22474225,  
chr16:21896688, chr16:21464446, chr16:70404122, chr16:70365621

esv3570465, esv2714195, esv2658959,  
esv3638402, nsv833195, esv3892828,  
nsv571825, esv3638404, nsv1057598,  
nsv1786, nsv477931, esv3638406, nsv953805,  
nsv953806, nsv1078216, dgv50e203,  
esv3892829, esv3638408, esv3638410,  
esv3638409, esv3638411, nsv984311,  
nsv1787, nsv428325, nsv1108997,  
esv3638412, esv2678036, nsv472917,  
nsv833196, esv2640928, esv2375355,  
esv3638413, esv2666562, esv29641,  
nsv475846, nsv1113783, nsv977959, nsv9439,  
nsv833197, dgv2834n100, esv21568,  
nsv1160385, nsv1139654, esv3435168,  
nsv977960, nsv953807, nsv469789,  
dgv1517e59, nsv1070345, dgv2835n100,  
dgv2836n100, dgv2838n100, dgv2837n100,  
dgv2839n100, dgv2840n100, esv2662004,  
esv2714198, esv2714199, esv2714200,  
nsv1064477, nsv1145753, nsv977961,  
dgv2841n100, esv3638414, esv3638415,  
esv3892844, esv3892833, dgv4991n54,  
dgv2842n100, nsv433444, dgv814e212,  
dgv2843n100, dgv2844n100, dgv2845n100,  
dgv2846n100, dgv2847n100, dgv469n67,  
dgv815e212, dgv816e212, dgv817e212,  
nsv953808, dgv1518e59, nsv984312,

chr16:31534502, chr16:31542908, chr16:33737687, chr16:32904579, chr14:106609994,  
chr17:36624863, chr17:36629191, chr16:33631903, chr16:32932087, chr17:36672410,  
chr14:106565208, chr17:25790936, chr17:25290286, chrUn\_gl000217:151925, chr21:9439218,  
chr7:64601394, chr7:65016908, chr16:33573350, chr7:64971115, chr7:65112568, chr16:33853426,  
chr16:33817545, chr16:32854756, chr1:148851323, chr16:32819777, chr2:132792792, chr1:121138738,  
chr16:32127824, chr16:32289990, chr16:33230472, chr16:33287011, chr16:32659444, chr7:61807761,  
chr2:90400009, chr2:91621497, chr10:42642214, chr15:20104419, chr18:15194983, chr2:92254235,  
chr10:42608813, chr16:46462872, chr2:132767917, chr18:15165339, chr7:53217659, chr7:61727020,  
chr7:61072705, chr1:149009703, chr16:46490413, chr16:32143447, chr1:148669245, chr1:148831155,  
chrUn\_gl000217:133304, chr15:20119266, chr21:9454093, chr16:33517468, chr7:57914379,  
chr16:33587509, chr7:64955704, chr16:32158141, chr16:32789357, chr13:19096310, chr21:14522769,  
chr7:61840744, chr1:149024090, chr7:61761635, chr7:61058196, chr7:61667275, chr16:46469279,  
chr10:42615237, chr7:53189339, chr7:64568472, chr9:70152742, chr9:69787720, chr9:42728303,  
chr7:65037865, chr2:91654391, chr9:70403673, chr2:92231783, chr2:91981968, chr2:90432584,  
chr16:33836119, chr17:25274445, chr18:15171691, chr2:132774259, chr16:32656338, chr16:34173150,  
chr7:64955765, chr18:15162965, chr21:10885038, chr10:42604348, chr16:46458853, chr2:92263073,  
chr2:132765315, chr7:57929149, chr10:42667608, chrY:13637319, chr10:38888849, chr22:16862531,  
chr1:121133097, chr15:20099636, chr1:148823084, chr16:32490080, chr10:38891096, chr16:32654335,  
chr7:65011431, chr16:33573232, chr7:65112510, chr16:33230604, chr16:33287143, chr16:32289989,  
chr16:32093043, chr7:61821678, chr10:42641894, chr16:32854257, chr16:33817547, chr2:91635751,  
chr2:90413825, chr7:64601390, chr17:25783496, chrUn\_gl000217:122996, chr7:53223815,  
chr1:148661175, chr2:91616013, chr10:42652734, chr2:90394525, chr7:61727655, chr1:149004460,  
chr7:61803147, chr16:46474128, chr16:32103644, chr7:61062403, chr9:70165112, chr9:70416032,  
chr9:42719704, chr7:61360527, chr7:61659389, chr2:92244232, chr7:61833407, chr2:132808884,  
chr7:53202101, chr21:14511809, chr2:90425291, chr16:33828760, chr7:65050214, chr2:91974612,  
chr10:42619725, chr7:61767157, chr18:15210682, chr2:91647069, chr9:69800110, chr16:32837289,  
chr13:19085321, chr17:25263011, chr7:64567002, chr16:32110614, chr15:28458559, chr15:23310978,

**DGV****Segmental Duplications**

nsv829581, esv2675247, esv1035588, chr1:147783151, chr1:149163313, chr1:16950916, chr1:17231952, chr1:21760557, chr1:17064394,  
esv2674598, dgv19n67, esv2744408, chr1:16984774, chr1:149213428, chr1:147852602, chr1:143665090, chr1:149216600, chr1:17175658,  
esv2758925, nsv428421, dgv1n68, nsv9213, chr1:147858380, chr1:143670863, chr1:149613619, chr1:144298080, chr1:144478309, chr1:144274481,  
nsv9324, nsv436814, esv2750816, chr1:149641238, chr1:143713812, chr1:144452606, chr1:147901321, chr1:149255634, chr1:17051487,  
esv2677321, nsv159668, dgv10e201, chr1:16996058, chr1:149669362, chr1:149283809, chr1:149035883, chr1:144876700, chr1:21737596,  
nsv945793, dgv1e203, esv2678817, dgv46e59, chr1:146462471, chr1:145364801, chr1:21795116, chr1:148249825, chr1:148002506,  
esv33046, dgv47e59, nsv821511, dgv20n67, chr1\_gl000192\_random:459805, chr1:146214650, chr1:146224432, chr1:145358539, chr1:146425855,  
nsv829625, esv2744430, esv3367641, chr1:146438580, chr1:146430620, chr1:146457711, chr1:144168168, chr1:144163123, chr1:146446365,  
esv29642, nsv954846, dgv21e199, chr1:148267938, chr1:148315659, chr1:144218734, chr1:148272712, chr1:144204421, chr1:144196466,  
esv2744441, esv2670550, nsv955054, chr1:148012600, chr1:148739635, chr1:148577550, chr1:144145783, chr1:144810724, chr1:145293306,  
esv3385457, nsv472863, dgv48e59, dgv49e59, chr1:148325179, chr1:146229449, chr1:146394748, chr1:149091770, chr1:146036159, chr1:147578085,  
dgv50e59, nsv834203, nsv954847, chr1:16913464, chr1:146395242, chr1:16912274, chr1:120381503, chr1:148022852, chr1:149101094,  
esv3429389, nsv499577, nsv7173, nsv3632, chr1:144614531, chr1:16905978, chr1:149101083, chr1:148022846, chr1:16900901, chr1:144146732,  
nsv834247, nsv221, nsv471343, nsv482190, chr1:144811667, chr1:148739139, chr1:148577053, chr1:21788085, chr1:149117254, chr1:21766304,  
nsv471344, nsv945569, nsv957837, chr1:120400041, chr1:146064160, chr1:147605996, chr1:148555349, chr1:144593043,  
nsv514916, nsv945570, esv3419518, chr1\_gl000192\_random:1270, chr1:146370380, chr1:148353247, chr1\_gl000192\_random:480590,  
nsv435932, nsv159149, nsv436039, chr1:145942148, chr1:147483860, chr1:147630262, chr1:146088425, chr1:17259346, chr1:16800937,  
nsv945571, nsv945572, nsv545643, esv34697, chr1:21759439, chr3:49721419, chr3:18946795, chr1:17255338, chr1:16825367, chr1:147856951,  
esv3444386, nsv3743, dgv1n16, nsv954848, chr1:143669434, chr1:17219869, chr1:16854740, chr1:17181559, chr1:149035881, chr1:21738004,  
nsv160674, esv2744463, esv2597795, chrX:20143899, chr1:6487720, chr1:144886480, chr1:17186107, chr1:16972126, chr1:149289470,  
nsv469795, nsv471655, nsv3854, esv29948, chr1:149675011, chr1:143669425, chr1:147856942, chr1:234919133, chr1:146471298, chr1:144833969,  
dgv21n67, nsv436652, nsv945794, chr1:145373855, chr1:149078766, chr1:16833539, chr1:144876721, chr1:149640537, chr1:143713108,  
esv3385518, nsv945795, dgv51e59, chr1:149254933, chr1:147900617, chr1:149215313, chr1:16986202, chr1:147852605, chr1:143665093,  
nsv945573, nsv160333, esv6890, dgv158n54, chr1:16982973, chr1:17075728, chr1:16945458, chr1:21759410, chr1:246981308, chrX:99193218,  
dgv159n54, nsv545647, esv2674537, chr11:62140541, chr6:56294447, chr3:126482969, chr4:109707285  
esv2744475, nsv957609, dgv2n6, dgv160n54,  
dgv161n54, dgv162n54, nsv545653,

nsv460860, nsv591829, esv2261145, chr2:228733895, chrX:109764469, chr14:35898954, chr12:4668024  
esv2543430, nsv524122, esv2675945,  
esv29633, nsv515820, esv3363717,  
esv3305427, esv2666694, esv2662110,  
esv2660570, esv3448890, esv3306450,  
nsv829732, nsv473095, esv3369457,  
esv2671438, nsv4022, esv2669411,  
esv2421767, nsv4023, nsv4024, nsv967069,  
nsv955351, nsv965213, nsv508246,  
esv2760738, esv2665912, nsv237910,  
nsv4025, esv2725956, esv1521994,  
nsv821587, esv22097, esv9585, dgv8611n54,  
nsv591834, dgv8612n54, dgv37n50,  
esv2725957, dgv129n73, esv2662772,  
esv1003652, dgv8613n54, nsv591840,  
nsv514170, dgv8614n54, nsv591848,  
nsv591849, nsv520012, nsv238089,  
nsv591850, nsv591851, nsv460861, nsv4026,  
esv3368869, esv3306738, esv3327611,  
esv3410767, nsv955353, nsv979880,  
nsv472230, esv1010377, esv1391168,  
nsv965214, esv33758, esv3303749,  
esv3374061, esv33116, esv2676541, nsv4027,  
nsv507125, esv2725958, esv3397853,  
esv3419922

nsv519476, nsv469698, esv27232,  
esv2581881, esv3329293, esv3306340,  
nsv475576, esv2668033, nsv518682,  
nsv528661, esv2726452, esv2726453,  
esv2726454, nsv525763, esv2675794,  
esv2665937, nsv472029, esv1653494,  
esv2669079, nsv237463, esv2673526,  
esv27654, esv2726455, esv2726456,  
nsv592968, esv2726457, esv1432010,  
esv1454765, esv22519, esv24471, nsv511203,  
nsv476266, dgv8823n54, dgv8824n54,  
esv26277, dgv849n67, nsv819035,  
dgv904e199, dgv8825n54, dgv786e201,  
nsv950296, esv2726459, esv33213,  
nsv822407, dgv8826n54, nsv592978,  
nsv950297, nsv592981, nsv461126,  
nsv950298, esv3778, nsv592982, esv996963,  
esv2726461, esv2038835, nsv436791,  
esv3417334, esv2675653, esv3378262,  
nsv592983, nsv592984, esv28466,  
dgv8827n54, dgv8828n54, nsv592990,  
esv2666343, esv3324582, esv3304862,  
nsv526569, nsv963394, esv2759213,  
esv2726463, esv2669458, esv8403,  
nsv829824, esv2657233, nsv508977,  
esv2662107, nsv10379, nsv4181, esv2667844,  
nsv592991, nsv10380, nsv820668, esv27980,

chr3:195209724, chr3:195210104, chr3:195217533, chr3:195218320, chr3:195220442, chr3:195221533,  
chr3:195222910, chr3:195225635, chr3:195217496, chr3:195218891, chr3:195219192, chr3:195219495,  
chr3:195221952, chr3:195222240, chr3:195223025, chr3:195226233, chr3:195227407, chr3:195228420,  
chr3:195228900, chr3:195229457, chr3:195217725, chr3:195220143, chr3:195229763, chr3:195205891,  
chr3:195208824, chr3:195209728, chr3:195202319, chr3:195218511, chr3:195203772, chr3:195200000,  
chr3:195204146, chr3:195212913, chr3:195211637, chr3:195218549, chr3:195200001, chr3:195200002,  
chr3:195206423, chr3:195214894, chr3:195220660, chr3:195200003, chr3:195219119, chr21:37260056,  
chr2:107554856, chr6:32844254, chr5:156278142, chr3:195447355, chr3:195473005, chr3:197369994,  
chr5:1653485, chr5:1610340, chr5:266128, chr3:195682795, chr3:73113999, chr5:288235, chr3:897552,  
chr2:242968084, chr5:1594142, chr5:218030, chr5:1568461, chr5:261507, chr3:195341293,  
chr3:195347604, chr3:195511288, chr3:195510013, chr3:195506461, chr3:195505720, chr5:26217139,  
chr3:895257, chr8:70238816, chr3:195721776, chr5:270280, chr3:197359367, chr5:1612777,  
chr3:73113998, chr3:195367878, chr5:237611, chr3:197344663, chr5:26222121, chr3:195662287,  
chr5:26228056, chr2:242956216, chr2:26625, chr21:48096355, chr5:32649, chr2:164215

esv2759245, nsv593903, nsv442899,  
nsv524710, esv2668119, esv2653365,  
esv2345789, nsv593904, esv3356109,  
esv3306205, esv2464555, esv2334162,  
esv988525, esv2665114, dgv140n6,  
esv2727372, nsv956859, esv2236934,  
esv3389320, esv3303887, esv22715,  
nsv525305, nsv822521, nsv829897,  
esv2129909, esv2727373, esv2671781,  
nsv475008, nsv475899, nsv480712,  
nsv477907, esv8691, nsv956918, nsv956907,  
nsv525914, nsv481472, nsv479505,  
nsv472008, nsv479627, esv2431486, nsv4290,  
esv2671506, esv21883, nsv829898,  
nsv966259, nsv523344, esv29094,  
esv2030668, esv2727375, esv2668330,  
nsv4291, esv2677235, esv26095, esv275484,  
esv3307515, esv3408298, esv2727376,  
esv989795, dgv124e180, esv3301828,  
esv2671545, nsv520670, nsv470025,  
esv2533655, esv3374664, esv3442940,  
nsv593905, nsv291392, dgv83n17,  
esv3376271, nsv461321, nsv593906,  
nsv818226, nsv10476, esv2671379, esv22356,  
nsv517147, esv2422155, nsv442900,  
esv2760889, nsv514205, nsv509886, nsv4292,  
esv2727377, esv2659157, esv2727378,

chr8:136635813, chr20:31436477, chr7:57591796, chr20:26138079, chr7:57616300, chr20:26122674,  
chr17:20777777, chr17:21506101, chr17:22071425, chr7:57633140, chr17:20773705, chr20:26118541,  
chr17:21509996, chr20:26160439, chr7:57556950

nsv829966, nsv594651, nsv4381, esv2727796,  
nsv594652, esv3325241, esv3333536,  
esv2727797, esv2076165, esv4339,  
nsv955684, esv1006939, esv1326491,  
esv2727798, nsv441888, esv2762448,  
esv25163, nsv516070, nsv822614,  
esv2763808, esv3346423, nsv4382,  
esv3354185, esv2727799, esv1975599,  
nsv4383, esv2669073, nsv523289,  
esv2476295, nsv950051, nsv4384, nsv525645,  
nsv289841, nsv829967, nsv519903,  
esv2677991, esv1487732, nsv822615,  
nsv437395, nsv518154, esv3402603,  
esv3304352, esv3427873, esv3309896,  
esv3436214, esv1165662, esv2727800,  
esv2185029, esv4331, esv2727801,  
nsv955704, esv2727802, esv2727803,  
nsv822616, esv2727804, esv2727805,  
esv2727808, esv2727809, nsv955667,  
esv7158, esv2033100, esv3924, esv2727810,  
esv995866, dgv151n6, nsv955659,  
esv1603902, esv3305821, esv3393306,  
nsv508287, esv2289844, esv2663080,  
nsv518185



nsv508363, nsv830317, esv2759345, chr16:33426009, chr15:20390970, chr15:21397632, chrX:146036557, chr1:78781859, chr10:29984844,  
nsv968180, nsv830318, nsv4857, esv2763457, chr2:85189962, chr9:88879467, chr2:129274864, chr17:52555161, chr19:19937825, chr19:21562530  
nsv598322, dgv706n27, nsv471014,  
dgv9814n54, esv9730, nsv821303, esv22698,  
nsv10702, nsv964860, dgv3297e59,  
esv3337828, dgv3298e59, nsv964861,  
dgv3299e59, nsv598326, esv996027,  
esv23909, esv3440831, esv2665150,  
nsv598327, dgv9815n54, nsv823091,  
esv990716, dgv9816n54, dgv9817n54,  
dgv9818n54, nsv10703, nsv950071,  
nsv598348, esv35035, nsv968182,  
dgv1023e199, nsv10704, esv2662200,  
esv23269, nsv474336, esv3411385,  
nsv964862, esv2660465, nsv930480,  
esv2763458, nsv328503, esv3357380,  
nsv329525, esv2591326, esv2005948,  
nsv328501, dgv941e201, dgv942e201,  
nsv955846, nsv4858, nsv4859, esv2730255,  
esv2730256, esv2759346, nsv10706,  
esv34525, nsv964863, nsv521534, dgv948n67,  
esv2730257, esv2673244, esv2730258,  
nsv327506, nsv830319, esv2671688,  
esv2760964, nsv950072

nsv462240, nsv598822, esv2422510, chr1:108900941, chr1:108989309, chr1:108755625, chr3:120043417  
esv1409944, nsv329250, nsv327614,  
dgv9917n54, dgv9918n54, esv2676756,  
nsv507271, esv2762529, nsv509975,  
esv1617263, nsv598833, esv2730416,  
nsv598834, esv1944398, esv2665313,  
esv2730418, esv2669543, nsv483007,  
nsv10713, esv2730419, esv1952008,  
esv2730420, nsv327400, esv1095730,  
nsv10714, esv26737, nsv955708, esv2675188,  
nsv968960, nsv968961, dgv9919n54,  
nsv462245, nsv598838, nsv818355,  
nsv509976, esv1001640, nsv327420,  
esv1390094, esv3428885, esv3304277,  
esv2563889, dgv201n6, esv3359009,  
esv3305770, esv3400686, nsv830375,  
esv2730421, nsv598839, nsv830376,  
esv3395633, esv2658577, nsv474611,  
nsv477365, nsv598840, nsv830377,  
nsv598841, nsv511303, dgv952n67,  
nsv820329, esv5749, esv24059, esv991086,  
dgv148e180, nsv513246, esv2730422,  
esv2666610, nsv598842, dgv9920n54,  
dgv9921n54, dgv9922n54, nsv442953,  
dgv9923n54, nsv514313, dgv9924n54,  
nsv598867, dgv9925n54, nsv598869,  
nsv598874, esv2730423

nsv830523, nsv830524, esv2657305, esv6048, chr21:37259295, chr6:32844249, chr13:64384484, chr2:107554853, chr3:195241225, chr19:24341423,  
nsv518243, dgv358n21, nsv522295, chr5:157116659, chr22:31051281, chr5:157077834  
nsv969006, esv2730953, esv2674952,  
esv1009526, esv1004108, esv2667486,  
esv2730954, nsv477873, nsv474311,  
nsv528418, esv2661490, esv2730955,  
nsv515686, nsv950432, nsv474929,  
nsv830526, nsv600132, esv2730956,  
esv2678778, nsv968264, esv3387468,  
nsv5089, nsv600133, nsv462497, esv997268,  
esv6935, esv2759389, esv2730957,  
esv2730958, esv2730959, esv2548260,  
nsv980747, nsv527582, esv2730960,  
nsv600134, nsv10766, nsv474809, nsv473743,  
nsv5090, nsv509097, esv1006771, nsv521000,  
nsv479605, nsv471941, esv22643, esv2674272

nsv831032, nsv5793, nsv831033, esv3363878, chr7:66303060, chr7:75801485, chr7:66279357, chr7:65976158, chr7:66301034, chr7:65978173,  
nsv476326, nsv981527, esv2669330, chr7:65982168, chr7:65993397, chr7:66000101, chr7:66006098, chr7:72588834, chr7:74489986,  
esv33268, nsv966848, esv3414828, chr7:72455742, chr7:74959150, chr7:72819983, chr7:72694592, chr7:99793993, chr7:99911392,  
nsv517573, nsv5794, nsv966849, nsv971395, chr7:99779749, chr7:102019334, chr7:6040350, chr7:66745441, chr7:76666548, chr7:72505218,  
nsv8141, nsv966851, nsv970532, nsv509208, chr7:74908585, chr7:74931125, chr7:101975581, chr7:74694336, chr7:75125369, chr7:76150897,  
nsv8142, nsv482102, nsv7402, esv3352039, chr7:76640837, chr7:101976995, chr7:6748938, chr7:5054531, chr7:44041274, chr7:102294507,  
nsv8143, esv2761338, nsv971396, nsv981528, chr7:102195407, chr7:72329132, chr7:102290855, chr7:102191762, chr7:44037585, chr7:76687870,  
esv24294, nsv482104, nsv8144, nsv981665, chr7:101994521, chr7:66740071, chr7:72340252, chr7:76168818, chr7:99910002, chr7:99908612,  
nsv510089, nsv971037, esv3416980, chr7:99895161, chr7:75119840, chr7:57258595, chr7:74765724, chr7:72531393, chr7:99881480,  
nsv950551, nsv981666, nsv970533, chr7:74633605, chr7:99870374, chr7:99819660, chr7:74142511, chr7:72506861, chr7:99854072,  
nsv981529, nsv8145, nsv950552, esv2658348, chr7:74340922, chr7:74847765, chr7:74963942, chr7:72478889, chr7:74936723, chr7:99903894,  
nsv970534, nsv970882, nsv981530, chr7:74309156, chr7:75121878, chr7:66742207, chr7:44038075, chr7:102192252, chr7:102291345,  
nsv951355, esv1398337, nsv607486, chr7:76668180, chr7:44041418, chr7:75125374, chr7:74340888, chr7:99903081, chr7:74307861,  
esv3287828, esv23295, nsv820906, chr17:57248011, chr7:101975687, chr7:74959099, chr7:99898320, chr7:74694325, chr7:74931074,  
dgv11446n54, nsv607489, dgv11447n54, chr7:74286049, chr7:74694102, chr7:72813080, chr7:72786996, chr7:72700442, chr7:76253689,  
nsv607491, dgv11448n54, dgv11449n54, chr7:101977100, chr7:5075536, chr7:75144446, chr7:6759941, chr7:66738131, chr7:76658069,  
nsv607498, nsv528969, nsv970883, chr7:72496683, chr7:74327547, chr7:99901954, chr7:74934780, chr7:74962805, chr17:57247875,  
esv3341746, nsv831034, nsv8146, nsv607499, chr7:44037582, chr7:102290852, chr7:102191759, chr7:76668708, chr7:74694564, chr7:72524745,  
nsv8148, nsv8149, nsv970884, nsv967334, chr7:74908813, chr7:99909993, chr7:72507381, chr7:74309673, chr7:72479405, chr7:74696575,  
nsv970885, nsv970535, nsv951356, nsv8150, chr7:5059905, chr7:76279229, chr7:72349310, chr7:75103388, chr7:102003633, chr7:5084888,  
nsv971397, nsv8151, nsv981531, nsv820756, chr7:6768803, chr7:76178033  
esv28657, nsv981532, nsv970536,  
esv3379624, esv3444656, nsv971038,  
nsv981667, esv3426613, esv3441281,  
esv23669, nsv607500, nsv607501, nsv821338,  
dgv11450n54, dgv11451n54, dgv11452n54,  
nsv981533, nsv981668, nsv970537,

nsv608080, nsv608147, nsv464671, chr12:23037143, chr4:144730099  
dgv11570n54, esv2661784, nsv478799,  
nsv464673, nsv608150, esv2671616,  
nsv608151, esv3431116, esv2674667,  
esv21685, esv2421473, esv2761159,  
nsv442061, nsv514439, esv2672432,  
esv2735023, esv3354493, esv3309484,  
esv26791, esv3303910, esv3324264,  
nsv365322, dgv11571n54, esv3389118,  
nsv526883, esv2759554, nsv476818,  
esv2385229, esv5171, esv2735024, dgv235n6,  
nsv958411, esv1010951, esv8850, esv3906,  
esv2735025, esv2659693, esv989131,  
esv1139378, nsv955977, esv9669,  
esv2735026, nsv11, nsv5898, esv2657607,  
nsv475901, nsv475701, esv2673039,  
nsv608154, nsv824267, nsv608155,  
nsv515693, esv3417036, nsv608156,  
nsv464674, esv2752141, nsv428183,  
esv2759555, nsv464675, nsv608157,  
nsv470384, dgv427n21, nsv437027, esv26741,  
esv2762694, nsv519432, nsv818545,  
esv2661413, dgv29e196, dgv428n21, esv6655,  
esv3377857, esv1003541, esv1751628,  
esv3432287, esv2735030, nsv437998,  
dgv11572n54, esv2667081, esv2663569,  
esv2599634, nsv608160, esv2735031,

nsv7419, nsv499795, nsv6388, esv2657611, chr12:14369515, chr11:114217609, chr20:62904852  
nsv528321, nsv507492, esv275073,  
esv2737569, nsv520611, esv2737570,  
nsv6389, esv2737571, esv3430899,  
esv2737572, esv3385385, esv2737574,  
nsv971352, nsv6390, nsv476782, nsv6391,  
esv275241, nsv508527, esv2761232,  
esv2635480, esv9266, esv2019272,  
nsv512067, dgv190e180, nsv612172,  
nsv465806, esv3520, nsv957670, esv3270274,  
nsv499732, dgv255n6, esv2737575,  
esv1765110, nsv436577, esv2676069,  
nsv465807, nsv612173, nsv527164,  
esv274913, esv2759641, esv28916,  
nsv475173, nsv480777, esv3410295,  
esv3308758, esv3307528, esv3390775,  
esv1219720, esv3394157, nsv509277,  
nsv6392, esv3310429, esv3399749,  
nsv476822, nsv508528, esv2764064,  
dgv12310n54, esv2659259, dgv12311n54,  
esv22071, esv2667830, nsv499338,  
esv988890, nsv820809, dgv12312n54,  
dgv12313n54, nsv612189, dgv12314n54,  
dgv12315n54, dgv12316n54, esv2421643,  
nsv612199, nsv612204, dgv12317n54,  
nsv6393, nsv473379, esv2578193, nsv951469,  
dgv12318n54, esv2657497, esv23187,

nsv824998, nsv968736, esv3328456,  
esv3429931, nsv416131, dgv12803n54,  
nsv472681, nsv614924, esv22781,  
esv2669547, dgv12804n54, nsv614930,  
nsv614933, nsv950906, nsv968737,  
nsv522838, nsv982325, esv2306628,  
esv2089533, esv6348, nsv415660, nsv824999,  
esv2442788, esv1923447, dgv1360e199,  
esv2673087, esv2761546, nsv950907,  
nsv416110, nsv972428, nsv831660,  
nsv520001, nsv972429, nsv6624, esv3305699,  
esv3323096, nsv950908, nsv475931,  
esv2668332, nsv831661, nsv473484,  
esv2738813, esv2663765, esv2535600,  
esv2661849, nsv442560, nsv982326,  
nsv972430, nsv972431, nsv972788,  
nsv950909, esv28215, nsv972789, nsv6625,  
nsv831662, nsv972790, nsv950910, esv25444,  
nsv6626, nsv972432, nsv973382, esv2675029,  
esv2668826, esv2670739, nsv969695,  
nsv415491, nsv982327, nsv972433,  
esv3310505, esv3327131, nsv972791,  
esv1727048, esv2762823, esv2761547,  
esv3327906, esv3305119

chr7:48881751, chr5:53041016, chr10:103934641, chr7:48965665, chr12:88176700, chr1:43356587,  
chr9:97069068, chr10:89115603, chr10:81599292, chr10:81462769, chr10:88984991, chr10:89117211,  
chr10:81600900, chr10:52436248, chr9:97122780, chr9:38475368, chr7:6369046, chr9:38543969,  
chr9:33511239, chr9:84670187, chr9:90539277, chr9:90730601, chr9:95650715, chr1:143200000,  
chr3:197782986, chr8:43105721, chr9:95570617, chr6:26634615, chr2:133110282, chrY:13262550,  
chrUn\_gl000243:29533, chrUn\_gl000214:108559, chr21:9708049, chr4:49272573, chr1:143270154,  
chr4:49525503, chr9:45355990, chr9:66493143, chr9:45352101, chr9:66489234, chr13:41455741,  
chr13:52744208, chr9:33509234, chr9:33484738, chr13:20103469, chr4:85387050

nsv615374, nsv466575, nsv466576, chr15:78198639, chr12:107665276, chr14:51904337  
dgv12880n54, nsv615377, nsv615378,  
esv28616, nsv615379, dgv1377e199,  
esv2739054, dgv497n21, nsv615380,  
nsv615381, nsv466577, esv2739055, nsv6722,  
nsv831727, nsv478648, esv2739056, esv5200,  
esv2739057, nsv476947, nsv951768,  
esv2671313, nsv825096, esv2660141,  
nsv471324, esv2670778, esv26069,  
nsv520376, nsv615382, esv28697, nsv518112,  
nsv615383, nsv818724, nsv951769, nsv6723,  
esv2739058, esv2739059, esv2778,  
esv1157058, esv2678543, nsv951770,  
esv1009770, nsv982346, esv2739060,  
dgv1265e201, esv2743007, dgv1266e201,  
nsv951771, esv1129526, esv2739065,  
nsv512118, esv2901, esv1706831, esv8629,  
esv2739067, esv2739068, esv1725840,  
nsv951772, nsv831728, nsv972807,  
nsv951773, nsv972808, esv2739069,  
nsv972453, nsv415888, esv2739070,  
esv2660941, nsv951774, dgv1378e199,  
esv2739071, nsv956125, esv1113963,  
dgv1379e199, esv2739072, esv2150257,  
nsv956099, esv1639805, esv2618000,  
nsv526979, esv3423649, esv2739074,  
nsv416781, esv2666546, nsv615384,



esv2759747, nsv510991, nsv8636, nsv436102, chr10:46476964, chr10:49268060, chr10:57569494, chr10:47529169, chr10:81390559, chr10:58185253,  
nsv7203, esv2736163, nsv550763, nsv467059, chr10:46843511, chr10:47324316, chr10:49033267, chr10:51448845, chr10:81675581, chr10:47576087,  
esv21870, nsv831860, nsv831861, nsv528799, chr10:88787402, chr10:75497650, chr10:88760721, chr10:46171743, chr10:47703925, chr10:46319300,  
esv2678415, esv2672759, esv2670465, chr10:51732600, chr10:51222928, chr10:75432278, chr10:48105707, chr10:47189999, chr10:49216137,  
esv3398674, esv3306598, esv3309440, chr9:76262564, chr10:38456658, chr10:42956662, chr10:42960773, chr10:43276748, chr10:88751887,  
esv3425650, esv1081992, esv1010922, chr10:81663255, chr10:52498045, chr10:88828344, chr11:1576025, chr10:52467445, chr10:81632438,  
nsv476735, esv6330, nsv475156, esv2674312, chr9:90456215, chr10:89148741, chr10:56028403, chr10:56177753, chr10:57346176, chr10:81390560,  
esv3302822, esv995742, esv1308340, chr10:46692890, chr10:48879443, chr10:58190503, chr10:81672210, chr10:47576096, chr10:88870572,  
nsv957742, esv2470698, esv2459256, chr14:88418873, chr10:47767474, chr10:48275802, chr10:47152145, chr10:47746316, chr10:47171126,  
esv2008130, esv2661026, nsv442179, chr10:48187336, chr10:88760724, chr10:51211554, chr10:46307923, chr10:75419335, chr10:51462405,  
esv2421380, esv2759748, nsv467189, chr10:46712815, chr10:48899348, chr9:76262565, chr10:42956751, chr10:43279736, chr10:88752022,  
nsv471969, esv33233, dgv136e199, chr10:81666346, chr10:48747514, chr10:46560617  
nsv951589, nsv947966, nsv820767,  
nsv831862, nsv951590, nsv550803,  
nsv433259, nsv6554, nsv550804, nsv947967,  
dgv137e199, nsv498727, nsv971752,  
nsv974941, nsv982761, nsv971755,  
nsv550805, nsv947968, nsv947969,  
nsv469543, nsv947970, nsv550806,  
nsv947971, nsv947972, nsv469669, esv24863,  
nsv820931, nsv947973, nsv550807, esv33214,  
nsv947974, dgv12e203, nsv437672,  
nsv982763, nsv831863, nsv975693,  
nsv975696, nsv947975, dgv1121n54,  
nsv550810, nsv831864, nsv950951, nsv8637,  
nsv8638, nsv6565, nsv8639, nsv550811,  
nsv467190, esv1001778, nsv6576, nsv550812,

nsv825594, nsv7580, esv9290, esv28769, chr10:124331382, chr10:124329954  
dgv1409n54, esv2663177, nsv552253,  
nsv552254, nsv955802, nsv516138, nsv8729,  
nsv428240, esv2759786, nsv552255,  
esv23096, nsv508611, nsv8730, nsv7581,  
esv2760157, esv2764158, nsv55, nsv7582,  
nsv825595, nsv948209, nsv8731, nsv819547,  
nsv499308, nsv825596, nsv436043,  
nsv442592, esv2422149, esv2658567,  
nsv951865, nsv820718, dgv1410n54,  
dgv1411n54, dgv175n67, dgv176n67,  
esv33340, nsv514541, dgv1412n54,  
nsv971857, nsv948210, nsv7583, nsv507579,  
nsv56, nsv821496, esv1000689, nsv951866,  
nsv499097, dgv1413n54, nsv552275,  
esv2676690, nsv948211, nsv514542,  
nsv24315, esv2362486, esv22906, nsv7584,  
esv3361994, nsv509370, esv3308621,  
esv3306648, esv3340044, nsv7585,  
dgv516e59, nsv25104, nsv478272,  
esv3397858, esv3306380, esv3421978,  
nsv24903, nsv832010, nsv975804, esv7958,  
esv6242, esv2453822, esv3305325,  
esv3309892, esv1608173, esv3441593,  
nsv7586, esv2674518, nsv474515, nsv948213,  
nsv476827, nsv7587, esv3376979,  
esv3304322, esv3422703, nsv958565,

nsv553827, esv2422339, nsv467763, chr1:227817058, chr12:7335127  
nsv553860, esv2760599, nsv553864,  
nsv832090, esv3440336, nsv553867,  
nsv521288, nsv523452, nsv442224,  
nsv521676, esv2744251, esv2321478,  
esv2744254, nsv38658, esv988937,  
nsv957220, esv2744255, esv1982398,  
esv3370, esv2744256, esv2760164,  
nsv951322, esv2744257, esv2744258,  
esv2751021, esv3446977, esv2644038,  
nsv467764, dgv1718n54, dgv196e199,  
esv2759811, esv2744259, esv4856,  
esv2661825, esv3258163, nsv437708,  
nsv553870, nsv467765, nsv553871,  
nsv553872, esv3380680, esv1061768,  
nsv437709, esv2760212, nsv8799,  
esv2678072, esv26376, nsv982997,  
esv2421640, nsv442606, nsv514604,  
esv2667377, nsv517418, nsv818806,  
esv1136147, esv1261238, nsv428252,  
nsv520281, nsv526726, dgv1719n54, nsv8800,  
esv2520553, nsv526614, esv2744260,  
esv2744261, esv2164088, esv2744262,  
esv1005260, nsv38780, esv1278199,  
nsv38539, nsv553876, nsv553877, nsv7716,  
esv2760183, dgv136n27, dgv1720n54,  
dgv33n17, nsv553880, esv2647190,

nsv832442, esv33314, esv2676422, chr13:49837894, chr13:48900512, chr12:112104733, chr3:101311470  
esv2745986, esv1536875, nsv469456,  
nsv559202, nsv517246, esv1457683,  
esv2745987, nsv958682, esv2745988,  
nsv472434, nsv832443, esv2745989,  
nsv832444, dgv2682n54, esv2446886,  
esv2387704, dgv298e199, nsv818921,  
nsv515833, nsv438218, nsv476769,  
nsv524627, esv2745990, esv2745991,  
esv2494968, esv2745992, esv2089729,  
esv2939, esv2745993, esv2586961,  
nsv958674, esv997045, esv1020820,  
nsv471983, nsv52978, nsv973085, nsv748,  
esv2745994, nsv559205, nsv469458,  
nsv510299, esv3306300, esv3389043,  
nsv832445, esv3432454, esv2745995,  
nsv952197, nsv522671, nsv749, nsv973086,  
nsv513363, esv1479608, nsv750, nsv751,  
nsv752, nsv753, esv23857, nsv826405,  
nsv826406, nsv510300, nsv983341,  
nsv475563, dgv97n21, nsv515887

esv26589, nsv973132, nsv913, nsv975535, chr12:123178353, chr20:32831280, chr12:76451743, chrUn\_gl000212:127273, chr2:91934335,  
nsv517200, nsv952498, nsv560490, chr1:227812214, chr12:7333743  
esv2746501, nsv52669, esv1005186,  
esv1123331, nsv52581, nsv7239, esv3413472,  
nsv513373, esv2660091, dgv22n68,  
nsv560491, nsv455732, nsv560492, nsv914,  
nsv560493, nsv560494, nsv476743,  
esv2646329, esv2761773, esv28503,  
esv996114, nsv826532, esv1057986,  
esv3338866, esv2746502, esv2746503,  
esv2746504, nsv477316, nsv826533,  
esv2667356, nsv826534, dgv44e19,  
esv2746505, esv2417445, esv3412579,  
esv2677110, esv2659767, esv2746506,  
esv987770, esv1517115, esv1328844,  
dgv927e59, nsv952499, esv2746507,  
esv3409514, esv1489716, esv2746509,  
esv2422416, nsv560495, esv24540,  
nsv976655, esv2656660, esv3385376,  
esv2759918, nsv442292, esv35148,  
nsv524660, dgv2926n54, nsv455733,  
nsv832534, nsv519344, esv2619454,  
esv1436194, esv3332718, esv2746510,  
esv2746511, esv2274657, esv2746512,  
esv993337, nsv480736, nsv522321, nsv915,  
nsv560499, nsv509484, esv2746513,  
esv2746514, dgv2927n54, esv29401,

nsv455914, nsv561965, nsv821672, chr3:12198608, chr6:48116220, chrX:139114811, chr1:113992563, chr15:57538771, chr1:81892451,  
dgv3204n54, dgv3207n54, nsv561979, chr12:52105859, chr10:44284310, chr1:54440282, chr4:83049988  
dgv3211n54, nsv562067, esv21584,  
esv2661680, dgv3213n54, dgv3214n54,  
dgv3215n54, dgv3216n54, nsv832635,  
nsv507707, esv3431288, nsv9082, esv24073,  
dgv3217n54, nsv562086, nsv562088,  
nsv524318, nsv826682, nsv983600,  
esv2672796, esv2761796, nsv512324,  
esv995936, esv7260, esv4726, esv2747544,  
esv3248385, esv2665820, nsv826683,  
esv2747545, nsv519044, nsv1072, nsv832637,  
esv2747546, esv1222385, esv2747547,  
esv2747548, esv2663265, esv2747549,  
esv2751147, esv3374750, esv3309795,  
dgv227n27, dgv3218n54, esv2747550,  
esv7546, nsv562091, nsv455918, nsv471140,  
esv3429513, esv2759942, esv2667656,  
esv2674703, nsv442315, esv2760321,  
nsv525504, esv2449958, esv3304456,  
esv3426759, nsv826684, esv3302842,  
esv34387, nsv473299, esv2677039,  
nsv832638, nsv521036, nsv9083, nsv976129,  
nsv455920, nsv562092, nsv826685,  
nsv951893, esv2662843, esv3329730,  
esv3303716, esv3309567, esv3439869,  
nsv562093, nsv455921, nsv562094,

nsv562927, nsv456091, nsv562950,  
nsv957481, esv3447529, nsv523519,  
esv3402039, nsv477538, nsv521902,  
esv3377620, esv8421, esv3411800, nsv1145,  
dgv1101e59, nsv456092, nsv562951,  
esv2637065, esv3306019, esv3308223,  
esv3358385, esv1164001, nsv527215,  
esv34003, esv2663767, esv2747873,  
dgv237e201, nsv957479, nsv951910,  
nsv510934, esv3351822, nsv528508,  
nsv519296, esv2761814, nsv832696,  
esv2747875, nsv510360, nsv821675,  
esv2668346, dgv345n67, esv996074,  
nsv826757, nsv562952, nsv832697,  
nsv478372, nsv510622, dgv346n67,  
dgv347n67, nsv826766, nsv456093,  
nsv562953, nsv562954, nsv1146, esv2672999,  
esv24692, esv2747876, nsv509512,  
esv995962, nsv513395, esv3363961,  
nsv832698, esv22911, nsv474342, nsv473298,  
esv2747877, nsv977272, nsv526668,  
esv3308710, esv3364634, esv2671626,  
esv2668656, esv2634464, esv2747878,  
nsv7247, esv2490241, esv2747879,  
nsv523329, nsv518301, esv2669958

nsv833752, nsv519802, esv1464086,  
esv2673946, nsv953975, esv2718178,  
esv2718179, nsv819522, nsv819321,  
esv3388355, nsv960784, nsv509721,  
esv3416229, esv991647, nsv960785,  
esv2763196, nsv513515, esv2464355,  
nsv478794, nsv819872, nsv960786,  
nsv960787, nsv525966, esv2718180,  
esv2665155, esv27676, dgv6267n54,  
nsv960788, nsv522659, esv22040, nsv518441,  
nsv960789, esv275168, esv33306, nsv960790,  
nsv578618, nsv458356, esv2718181,  
esv2147526, esv2718182, esv2718183,  
nsv954679, esv1213055, nsv960791,  
nsv578619, esv2718185, esv2664517,  
nsv482214, esv2718186, esv2718187,  
esv2660126, nsv482215, nsv2417,  
dgv623e199, esv2718188, esv23756,  
dgv6268n54, dgv6269n54, esv2662395,  
esv3096012, nsv507887, esv2718189,  
nsv474554, nsv963004, nsv978771,  
esv3415797, nsv963005, esv2718190,  
esv2668294, nsv819366, nsv828437,  
nsv828438, esv2718191, nsv978772,  
nsv524284, nsv961177, nsv833753,  
nsv138142, nsv961178, esv2665806,  
esv1002859, nsv963006, esv2662307,

chr16:51679669, chr7:87150717, chr1:241082928, chr6:5609121, chr5:79654559, chr9:4944336,  
chr11:74065472, chr15:66108252, chrX:100142287, chr2:41383691, chr8:142469116, chr18:29991839,  
chr8:83203525, chr3:39376428, chr2:201927752, chr4:74803992, chr8:82719947, chr13:21522091,  
chr12:9179790, chr15:67920129, chr7:84612812, chr19:42333659, chr17:2210055, chrX:118354685,  
chrX:73692514, chr1:191114829, chr4:78908686, chr9:91025121, chr2:207283697, chr1:179425027,  
chr3:42930797, chr1:202880875, chr13:53216567, chr2:63978489, chr5:153716696, chr15:99824500,  
chr9:128357914, chr2:195052067, chr10:30806212, chr15:35692832, chr3:80265394, chr1:55002442,  
chr1:58513524, chr4:24773099, chr2:175174421, chr18:70285442, chr11:110658437, chr6:32292957,  
chr1:116399252, chr12:93277488, chr2:33861509, chrX:100110016, chr1:80916503, chr5:135764581,  
chr6:27491225, chr6:166748054, chr4:73672957, chr11:5592229, chr3:147883871, chr19:11960603,  
chr19:12000032, chr19:12028900, chr19:11927167, chr19:12001437, chr19:12066459, chr19:12034965,  
chr19:11927200, chr19:11961051, chr19:11953540, chr19:11997678, chr19:11982695, chr20:30757558,  
chr12:99188231, chr14:67227225, chr18:49138262, chr19:12536369, chr19:12496799



**Genes**

**Microarray Nomenclature**

C16orf70, B3GNT9, TRADD, FBXL8, HSF4, NOL3, KIAA0895L, EXOC3L1, E2F4, ELMO3, MIR328, LRRC29, TMEM208, FHOD1, SLC9A5, PLEKHG4, KCTD19, LRRC36, TPPP3, ZDHHC1, HSD11B2, ATP6V0D1, AGRP, LOC100505942, FAM65A, CTCF, CARMIL2, ACD, PARD6A, ENKD1, C16orf86, GFOD2, RANBP10, TSNAXIP1, CENPT, THAP11, NUTF2, EDC4, NRN1L, PSKH1, CTRL, PSMB10, LCAT, SLC12A4, DPEP3, DPEP2, LOC100131303, DDX28, DUS2, NFATC3, ESRP2, MIR6773, PLA2G15, SLC7A6, SLC7A6OS, PRMT7, SMPD3, ZFP90, CDH3, CDH1, MIR7641-2, TANGO6, HAS3, CHTF8, UTP4, SNTB2, VPS4A, PDF, COG8, NIP7, TMED6, TERF2, CYB5B, MIR1538, NFAT5, NQO1, NOB1, WWP2, MIR140, CLEC18A, PDXDC2P, MIR1972-2, MIR1972-1, PDPR, LOC400541, CLEC18C, LOC105371328, SMG1P7, EXOSC6, AARS, DDX19B, LOC100506083, DDX19A, ST3GAL2, FUK, COG4, SF3B3, SNORD111B, SNORD111, IL34

arr[hg19] 16q22.1(67,174,211-70,676,534) hmz

CLUHP3, ZNF720, ZNF267, LOC102723753, HERC2P4, TP53TG3D, LOC390705, arr[hg19] 16p11.2p11.1(31,630,502-35,220,544) hmz  
TP53TG3, TP53TG3B, TP53TG3C, SLC6A10P, ENPP7P13, LINC00273, UBE2MP1,  
LINC01566, FRG2DP, TP53TG3HP, FLJ26245

## Genes

SPATA21, NECAP2, CROCCP3, MIR3675, NBPF1, CROCCP2, MST1P2, ESPNP, MST1L, CROCC, MFAP2, ATP13A2, SDHB, PADI2, PADI1, PADI3, PADI4, PADI6, RCC2, ARHGEF10L, ACTL8

## Microarray Nomenclature

arr[hg19] 1p36.13(16,736,737-18,176,173) hmz

PPP2R3A, MSL2, PCCB, STAG1, SLC35G2, NCK1, IL20RB

arr[hg19] 3q22.2q22.3(135,285,824-136,690,391) hmz

XXYLT1, XXYLT1-AS2, ACAP2, MIR5692C1, PPP1R2, APOD, SDHAP2, MIR570, arr[hg19] 3q29(194,650,488-195,753,451) hmz  
MUC20, MUC4, TNK2, SDHAP1

arr[hg19] 4p15.1(32,417,743-34,539,188) hmz

MOB1B, DCK, SLC4A4, GC, NPFFR2

arr[hg19] 4q13.3(71,709,992-72,972,453) hmz



KIF2A, DIMT1, IPO11, LRRC70, IPO11-LRRC70

arr[hg19] 5q12.1(61,362,329-62,376,568) hmz

NBPF22P, COX7C, MIR3607

arr[hg19] 5q14.3(84,996,731-86,195,913) hmz

SGCD, PPP1R2P3, TIMD4, HAVCR1, HAVCR2, MED7, FAM71B, ITK, CYFIP2,  
FNDC9, NIPAL4, ADAM19, SOX30, C5orf52, THG1L, LSM11, CLINT1

arr[hg19] 5q33.3(156,038,647-157,296,182) hmz

GTF2IRD1, GTF2I, NCF1, GTF2IRD2, STAG3L2, PMS2P5, GATSL1, WBSR16,  
GTF2IRD2B, NCF1C, GTF2IP1, LOC100093631, GATSL2, SPDYE8P, PMS2L2,  
STAG3L1, TRIM73, TRIM74, NSUN5P1, POM121C, SPDYE5, PMS2P3, HIP1

arr[hg19] 7q11.23(73,843,868-75,167,160) hmz

IMMP2L, LRRN3, DOCK4

arr[hg19] 7q31.1(110,303,526-111,466,461) hmz

MIR1208

arr[hg19] 8q24.21(129,124,948-130,225,683) hmz

SLC35D2, ZNF367, HABP4, CDC14B, AAED1, LOC441455, ZNF510, ZNF782,  
LOC100132781, LOC441454, NUTM2G, HIATL2, CTSL2, LOC340508,  
LOC100499484, LOC100499484-C9ORF174, CCDC180, LOC286359

arr[hg19] 9q22.32q22.33(99,066,432-100,163,998) hmz

ENG, AK1, MIR4672, ST6GALNAC6, ST6GALNAC4, PIP5KL1, DPM2, FAM102A, arr[hg19] 9q34.11(130,607,711-131,690,509) hmz  
NAIF1, SLC25A25, LOC100289019, PTGES2, PTGES2-AS1, LCN2, C9orf16, CIZ1,  
DNM1, MIR199B, MIR3154, GOLGA2, SWI5, TRUB2, COQ4, SLC27A4, URM1,  
MIR219-2, MIR2964A, CERCAM, ODF2, GLE1, SPTAN1, WDR34, SET, PKN3,  
ZDHHC12, LOC100506100, ZER1, TBC1D13, ENDOG, C9orf114, CCBL1, LRRC8A,  
PHYHD1



ZNF488, RBP3, GDF2, GDF10, PTPN20A, PTPN20B, FRMPD2P1, BMS1P1,  
BMS1P5, GLUD1P7, FAM25B, FAM25C, FAM25G, LOC399753, FRMPD2,  
MAPK8, ARHGAP22

arr[hg19] 10q11.22(48,365,294-49,699,016) hmz

PLEKHA1, MIR3941, ARMS2, HTRA1, DMBT1, C10orf120, FLJ46361, CUZD1,  
FAM24B-CUZD1, FAM24B, LOC399815, FAM24A, C10orf88, PSTK, IKZF5,  
ACADSB, HMX3, HMX2, BUB3

arr[hg19] 10q26.13(124,165,614-125,182,983) hmz

ANO3

arr[hg19] 11p14.3p14.2(25,377,880-26,543,422) hmz

SRGAP1, C12orf66, C12orf56, XPOT, TBK1, RASSF3, MIR548Z, MIR548C, GNS, arr[hg19] 12q14.2q14.3(64,434,226-66,149,363) hmz  
TBC1D30, FLJ41278, WIF1, LEMD3, MSRB3

HCAR3, HCAR1, DENR, CCDC62, HIP1R, VPS37B, ABCB9, OGFOD2, ARL6IP4, arr[hg19] 12q24.31(123,201,038-124,499,542) hmz  
PITPNM2, MIR4304, LOC100507091, MPHOSPH9, C12orf65, CDK2AP1, SBNO1,  
SETD8, RILPL2, SNRNP35, RILPL1, MIR3908, TMED2, DDX55, EIF2B1, GTF2H3,  
TCTN2, ATP6VOA2, DNAH10, CCDC92, ZNF664, ZNF664-FAM101A

arr[hg19] 13q21.31q21.32(65,352,957-66,563,970) hmz

UBAC2-AS1, UBAC2, MIR548AN, GPR18, GPR183, FKSG29, MIR623, TM9SF2, arr[hg19] 13q32.3(99,774,561-101,101,463) hmz  
CLYBL, MIR4306, ZIC5, ZIC2, PCCA

RGL3, CCDC151, PRKCSH, ELAVL3, ZNF653, ECSIT, CNN1, ELOF1, ACP5, ZNF627, arr[hg19] 19p13.2(11,509,008-12,539,633) hmz  
ZNF833P, ZNF823, ZNF441, ZNF491, ZNF440, ZNF439, ZNF69, ZNF700, ZNF763,  
ZNF433, ZNF878, ZNF844, ZNF788, ZNF20, ZNF625-ZNF20, ZNF625, ZNF136,  
ZNF44, ZNF563, ZNF442, ZNF799
